# Supplementary material for: An intercomparison of oceanic methane and nitrous oxide measurements
Source: Copernicus journal article supplement (doi:10.5194/bg-2018-274), 2018-06-14
Supplement: Supplementary file 2 [file SupplTable 6 CH4 methods.xlsx]

## Sheet: Methane analysis
Summary of methods used for methane analysis by laboratories participating in the intercomparison
			Sample analysis											Gas standards used by lab groups and comparison with SCOR standards
Lead Scientist	Institute	Reference	Brief description of method	Method for controlling temperature	Method for removal of water vapor	Typical equilibration temperature (oC)	Gas used to equilibrate or purge seawater sample	Water volume ml)	Headspace Volume (ml)	Oven temperature (oC)	Carrier Gas	Analyzer	Column	Personal Standard	Nominal SCOR ARS concentration stated in WG#143 Technical report	Nominal SCOR WRS concentration stated in WG#143 Technical report	Calculated concentration of ARS SCOR standard based on lab standard	Calculated concentration of WRS SCOR standard based on lab standard	Ratio of ARS Calculated concentration to Nominal concentration	Ratio of WRS Calculated concentration to Nominal concentration
Gui-Ling Zhang	Ocean University of China, P.R. China	Zhang et al (2004) J. Geophy. Res. 109 (C7), C07011	Purge and Trap (sparged with UHP N2,dried, and trapped on Porapak Q trap immersed in LN2)	Laboratory room temperature	Nafion drier and Drierite	20-25°C	Nitrogen @ 80 ml/min for 5 min	n/a	n/a			Shimadzu GC14B	3 m x 3 mm s/s column packed with 80/100 mesh Porapak Q	National Institute of Metrology, China 4.14 ppm +/-2% in nitrogen	SCOR ARS426320 1.938 ppmv	SCOR WRS464573 4.556 ppmv	SCOR ARS426503 1.863 ppmv	SCOR ARS464573 4.539 ppmv	0.947368	0.996269
Sam Wilson	University of Hawaii, USA	Wilson et al (2017) Geophy. Res. Letts. 44: doi: 10.1002/2017GL074458.	Purge and Trap (sparged with UHP He, dried, and trapped on Porapak Q trap immersed in LN2)	Laboratory room temperature	Nafion drier and Drierite	21	Helium @ 100 ml/min for 10mins	n/a	n/a	30	Helium	Agilent GC7890	30 m x 0.32 mm GS-CarbonPLOT capillary column	Scott-Marrin JA01155 20.15 ppm +/-2% in nitrogen	SCOR ARS416388 1.924 ppmv	SCOR WRS460867 4.540 ppmv	Not applicable	Not applicable	Not applicable	Not applicable
Philippe Tortell	University of British Columbia, Canada	Capelle et al (2015) LO Methods 13(7), 345-355	Purge and Trap (sparged with UHP He, dried, and trapped on Porapak Q trap immersed in LN2)	Laboratory room temperature	Nafion drier	21	Helium @ 50 ml/min for 4 mins	n/a	n/a			Shimadzu QP2010 quadrupole mass spectrometer	30 m CarbonPLOT column	10.3 ppm +/-5% in nitrogen	Not applicable	SCOR WRS464565 4.736 ppmv	Not applicable	SCOR WRS464565 4.744 ppmv	Not applicable	1.00169
Mercedes de la Paz	Instituto de Investigaciones Marinas-CSIC, Spain	de la Paz, (2015) Prog. Oceanogr., 138 (A), 18-31	Static headspace (19.7 ml N2 in 120 mL bottle, shaken and equilibrated overnight at thermostatted lab temperature. 18 ml of headspace, subsampled by replacement with brine, and 1 ml sampling loop injected onto column	Lab room temperature stable at 20 ºC	Magnesium perchlorate	20	Nitrogen	220	19.7	60	Nitrogen	Agilent GC7890	2 m 80/100 mesh Porapak Q	NOAA GMD 1.897 ppm, 3.00 ppm, 4.87 ppm	SCOR ARS426347 1.959 ppmv	SCOR WRS464537 4.827 ppmv	SCOR ARS426347 1.939 ppmv	SCOR WRS464565 4.862 ppmv	0.99	0.99
Hermann Bange	GEOMAR, Germany	Arévalo-Martínez et al (2017) JGR Oceans 122 171-184	Headspace (20 ml bottle with 10 ml of air or helium added, shaken for 20 secs, and then a minimum of 2 h equilibration).Subsample injected using gas-tight syrnge	recording of ambient temperature during headspace removal, thermometer placed in sample vial filled with water	GC injection port equipped with water trap filled with Sicapent	20-25°C	Helium (99.999%)	In dependence of the expected methane concentrations: 10.3 mL or 50,7 mL	10	60	Helium	Agilent 5890	1.83 m x 3.2 mm packed mole sieve 5A s/s column	Std 4 (Deuste-Steininger, calibrated against NOAA GMD by MPI, Jena) 1.967 ppm +/-1% in synthetic air; Std 5B (Deuste-Steininger): 101.9 ppm +/-2% in synthetic air	SCOR ARS416396 1.940 ppmv	SCOR WRS460872 4.585 ppmv	SCOR ARS416396 1.876 ppmv	SCOR WRS460872 4.612ppmv	0.967	1.006
Cliff Law	NIWA, New Zealand	Weller et al. (2013) Prog. Oceanography 116:193-206	Headspace equilibration									Agilent GC6890		CL5 1.751 ppm in nitrogen Std9 5.318 ppm in nitrogen	SCOR ARS416439 1.932 ppmv	SCOR WRS464562 4.552 ppmv	SCOR ARS416439 1.988 ppmv	SCOR WRS464562 4.556 ppmv	1.02899	1.00088
Laura Farias	Universidad de Concepción, Chile	Farias et al (2009) Bioegoesciences 6, 3053-3069	Static headspace (20 ml bottle with 5 ml helium headspace introduced. Shaken and then equilibrated at 30oC for 60 min) 0.5 ml injected into GC			30	Helium	15	5	60		Agilent GC6850	Mole sieve 5A PLOT capiliary column	NOAA GMD 1.875 ppm Air Liquide 1 ppm +/- 5% Air Liquide 5 ppm +/- 5%	SCOR ARS426350 1.953 ppmv	SCOR WRS460877 4.560 ppmv	SCOR ARS426350 2.074 ppmv	SCOR WRS460877 3.963 ppmv	1.06196	0.869079
Rob Goddard	Newcastle University, UK	Upstill-Goddard et al (1996), Deep Sea Res, 43, 1669-1682	Calibrated air headspace created in sample flask and equilibrated by pumped circulation through a closed GC circuit for 20 min. Automated switching of 1 ml sample loop into GC FID carrier gas line, folowe by automatic injection of ambient air and calibration gas samples.	Water bath		25	Calibrated compressed air (Air Products)	986	96.5	60	UHP nitrogen	Shimadzu GC 14 B -FID	Packed column: Porapak Q 80-100 mesh	SCOR ARS416408 1.961	SCOR ARS416408 1.961 ppmv	SCOR WRS460877 4.794 ppmv	Not applicable	Not applicable	Not applicable	Not applicable
John Pohlman	USGS, USA	None provided	Headspace: Seawater collected in a 1 L syringe, and 120 ml headspace added. Shaken for 2 mins	Laboratory room temperature	None	20-25°C	Carbon-free air	880	120			Picarro G2201-i cavity ring-down spectrometer			n/a	n/a
Gregor Rehder	Leibniz-Institute for Baltic Sea Research, Germany	None provided	Purge and Trap; Sparged with UHP N2,dried, and trapped on HayeSep D (60/80 mesh) trap	Laboratory room temperature		20-25°C	Helium	20 ml		45	Helium	Shimadzu GC-2014	HayeSep Q, mesh 80/100, 2 m x 1/8” x 2 mm, stainless steel	18.47 ppm (± 2 %), 1.88 ppm (± 5 %) (Linde Group, Berlin)	SCOR ARS426360 1.957 ppmv	SCOR WRS464538 4.698 ppmv
Andy Rees	Plymouth Marine Laboratory, UK	Upstill-Goddard et al (1996), Deep Sea Res, 43, 1669-1682	Calibrated air headspace created in sample flask and equilibrated on orbital shaker for 20 minutes. Headspace removed into gastight syringe and manually injected into GC FID carrier gas line, followed by automatic injection of ambient air and calibration gas samples.	Water bath	Nafion and Magnesium perchlorate column	25	Calibrated compressed air (BOC)	945	250	55	BIP N2 (Air Products)	Shimadzu GC-2010	Hayesep D, 4.0 m length, mesh 60/80	NOAA - CB11267; 2024.79 ppb Air Products: 0.999, 2.00, 2.99 ± 5%	SCOR ARS416389 1.959 ppmv	SCOR WRS464569 4.762 ppmv	Not determined	Not determined	Not determined	Not determined
Alberto Vieira Borges	University of Liège, Belgium	Borges et al (2015) Nature Geoscience, 8, 637-642	Headspace (50 ml N2 in 240 ml bottle, overnight equilibration at 21oC 15 ml subsampled, replaced with brine, 5 ml sampling loop injected onto column									SRI 8610C	Hayesep D, 5.0 m length, mesh 80/100	1.045 ± 0.021, 10.23 ± 0.20 in nitrogen	n/a	n/a
Macarena	Facultad de Ciencias del Mar y Ambientales (CASEM), Spain	None provided	Headspace equilibration in 50 ml SGE syringe. 40 ml withdrawn from sample bottle and 10 ml of nitrogen. Shake for 5 mins using a shaker and wait 5 mins.Inject through a 1 ml loop for methane	Laboratory room temperature	None	25	Nitrogen	40	10	300	Nitrogen	Bruker 450-GC	80/100 Hayesep N and 1.0 m × 1/8-in Molecular Sieve Porapak QS	1.9514 ppm, 10.06401 ppm	n/a	n/a
