# Supplementary material for: An intercomparison of oceanic methane and nitrous oxide measurements
Source: Copernicus journal article supplement (doi:10.5194/bg-2018-274), 2018-06-14
Supplement: Supplementary file 3 [file SupplTable7 N2O methods.xlsx]

## Sheet: Nitrous oxide
Summary of methods used for nitrous oxide analysis by laboratories participating in the intercomparison
												Gas standards used by lab groups and comparison with SCOR standards
Lead Scientist	Institute	Reference	Brief method of Gas extraction/equilibration	Typical equilibration temperature (oC)	Gas used to equilibrate or purge seawater sample	Water volume ml)	Headspace Volume (ml)	Oven temperature (oC)	Carrier Gas	Column	Analyzer	Personal lab standard	Nominal SCOR ARS concentration stated in WG#143 Technical report	Nominal SCOR WRS concentration stated in WG#143 Technical report	Calculated concentration of ARS SCOR standard based on lab standard	Ratio of ARS Calculated concentration to Nominal concentration
Gui-Ling Zhang	Ocean University of China, P.R. China	Walter et al. (2005) 32, L23613, doi: 10.1029/2005GL024619	Headspace equilibration							3 m x 3 mm s/s column packed with 80/100 mesh Porapak Q	Shimadzu GC14B	National Institute of Metrology, China 230, 610, 3040 ppb +/-2% in nitrogen	SCOR ARS426320 326.0 ppb	SCOR WRS464573 22326 ppb	SCOR ARS426320 326.8 ppb	1.0025
Sam Wilson	University of Hawaii, USA	Wilson et al (2017) Geophy. Res. Letts. 44: doi: 10.1002/2017GL074458.	Purge and Trap (sparged with UHP He, dried, and trapped on Porapak Q trap immersed in LN2)	21	Helium @ 100 ml/min for 10mins	n/a	n/a	30	Helium	30 m x 0.32 mm GS-CarbonPLOT capillary column	Agilent GC7890	Scott-Marrin JA01155 4810 +/-2% in nitrogen, NOAA GMD CB10298 357.56 ppb in air	SCOR ARS416388 325.3 ppb	SCOR WRS460867 22271 ppb	SCOR ARS416388 336.6 ppb	1.0347
Philippe Tortell	University of British Columbia, Canada	Capelle et al (2015) LO Methods 13(7), 345-355	Purge and Trap (sparged with UHP He, dried, and trapped on Porapak Q trap immersed in LN2)	21	Helium @ 50 ml/min for 4 mins					30 m CarbonPLOT column	Shimadzu QP2010 quadrupole mass spectrometer	4000 ppb +/-5% in nitrogen		SCOR WRS464565 23401 ppb
Mercedes de la Paz	Instituto de Investigaciones Marinas-CSIC, Spain	de la Paz, (2015) Prog. Oceanogr., 138 (A), 18-31	Static headspace (19.7 ml N2 in 120 mL bottle,shaken and equilibrated overnight at thermostatted lab temperature. Then, 18 ml of headspace subsampled by replacement with brine, and 1 ml sampling loop injected onto column	20	Nitrogen	220	19.7	60	Nitrogen	4 m 80/100 mesh Porapak Q	Agilent GC7890	NOAA GMD 324.97 ppb, 1020, 3100	SCOR ARS426347 332.1 ppb	SCOR WRS464537 23885 ppb	SCOR ARS426347 330.2 ppb	0.9943
Hermann Bange	GEOMAR, Germany	Arévalo-Martínez et al (2017) JGR Oceans 122 171-184	Headspace (20 ml bottle with 10 ml of air or helium added, shaken for 20 secs, and then a minimum of 2 h equilibration)	20-25°C	Helium (99.999%)	10.3	10	190	Argon/Methane (95% /5%)	1.83 m x 3.2 mm packed mole sieve 5A s/s column	Agilent 5890	Std4 (Deuste-Steininger, calibrated against NOAA GMD Std by MPI, Jena): 318.2 +/-1% in synthetic air Std 5B (Deuste-Steininger): 994.1 ppb +/- 2% in synthetic air manual dilutions of Std 5B with helium (1:2, 2:1,average precision: 3%)	SCOR ARS416396 328.7 ppb	SCOR WRS460872 22627 ppb	SCOR ARS416396 322.85 ppb	0.9822
Cliff Law	NIWA, New Zealand	None provided	Headspace equilibration								Agilent GC6890	CL5 323.11 ppb in nitrogen Std9 1010.29 ppb in nitrogen	SCOR ARS416439 325.9 ppb	SCOR WRS464562 22367 ppb	SCOR ARS416396 319.6 ppb	0.9807
Laura Farias	Universidad de Concepción, Chile	Farias et al (2009) Bioegoesciences 6, 3053-3069	Static headspace (20 ml bottle with 5 ml helium headspace introduced. Shaken and then equilibrated at 30oC for 60 min) 0.5 ml injected into GC	30	Helium	15	5	60		3-m Poropak	Varian 3380	Air Liquide 250ppb +/- 5% Air Liquide 500ppb +/-5% Air Liquide 1000ppb +/-5%	SCOR ARS426350 329.7 ppb	SCOR WRS464553 22746 ppb	SCOR ARS426350 335.5 ppb	1.0176
Rob Goddard	Newcastle University, UK	Upstill-Goddard et al (1996), Deep Sea Res, 43, 1669-1682	Calibrated air headspace created in sample flask and equilibrated by pumped circulation through a closed GC circuit for 20 min. Automated switching of 1 ml sample loop into GC FID carrier gas line, folowe by automatic injection of ambient air and calibration gas samples.	25	Calibrated compressed air (Air Products)	986	96.5	60	UHP Nitrogen	Q chromatographic column	Shimadzu GC 14 B -ECD	SCOR ARS416408 331.7	SCOR ARS416408 331.7 ppb	SCOR WRS464579 22746 ppb	Not applicable	Not applicable
Gregor Rehder	Leibniz-Institute for Baltic Sea Research, Germany	None provided	Purge and Trap; Sparged with UHP N2,dried, and trapped on HayeSep D (60/80 mesh) trap	20-25°C	Helium	20 ml		45	Helium	HayeSep Q, mesh 80/100, 2 m x 1/8” x 2 mm, stainless steel	Shimadzu GC-2014	Matheson 100 ppb Matheson 1000 ppb	SCOR ARS426360 326.5 ppb	SCOR WRS464538 23244 ppb	SCOR ARS426366 293.9 ppb	0.9002
Alberto Vieira Borges	University of Liège, Belgium	Borges et al (2017) Ecosystems, doi: 10.1007/s10021-017-0171-7	Headspace (50 ml N2 in 240 ml bottle, overnight equilibration at 21oC after initial shaking							Hayesep D, 5.0 m length, mesh 80/100	SRI 8610C	210 ± 21, 1990 ± 100 in nitrogen
Andy Rees	Plymouth Marine Laboratory, UK	Upstill-Goddard et al (1996), Deep Sea Res, 43, 1669-1682	Calibrated air headspace created in sample flask and equilibrated on orbital shaker for 20 minutes. Headspace removed into gastight syringe and manually injected into GC FID carrier gas line, followed by automatic injection of ambient air and calibration gas samples.	25	Calibrated compressed air (BOC)	945	250	55	BIP N2 (Air Products)	Poropak Q, 2.0m length, mesh 80/100	Shimadzu GC-2010	NOAA - CB11267; 359.73 ppb Air Products: 301.0, 400.0, 500.0 ± 1% ppb	SCOR ARS416389 330.7 ppb	SCOR WRS464569 23578 ppb	Not Determined	Not Determined
Macarena	Facultad de Ciencias del Mar y Ambientales (CASEM), Spain	None provided	Headspace equilibration in 50 ml SGE syringe. 40 ml withdrawn from sample bottle and 10 ml of nitrogen. Shake for 5 mins using a shaker and wait 5 mins	25	Nitrogen	40	10	350	Ar/CH4 (95%/5%)	0.5 m × 1/8-in stainless steel Hayesep N column (80/100) and 2.0 m × 1/8-in stainless steel Hayesep D column.	Bruker 450-GC	304.61 ppb, 474.38 ppb
Alyson Santoro	University California, Santa Barbara, USA	None provided	Headspace (35 mL UHP N2 in 160 mL bottle,10 mL overpressurization with UHP N2, equilibration at RT with gentle shaking for a minimum of 2h. 5 mL headspace withdrawl, injection into 1 mL sample loop.	22.5	UHP N2	160.7	35	100	UHP N2	Packed column, split; 2 x 3m, Haysep D	SRI 8610C, ECD temp 353ºC	Matheson 0.1 ppm and Matheson 1 ppm	SCOR ARS426366 326.5 ppb	SCOR WRS464585 22549 ppb	401.5 ppb	1.21299
John Bullister	NOAA PMEL	Bullister and Wisegarver (2008) Deep-Sea Res., 55, 1063-1074, 2008.	Purge and Trap
