# Supplementary material for: An intercomparison of oceanic methane and nitrous oxide measurements
Source: Copernicus journal article supplement (doi:10.5194/bg-2018-274), 2018-06-14
Supplement: Supplementary file 4 [file SupplTable8 CH4 and N2O calculations.xlsx]

## Sheet: Purge-and-trap
Parameters and calculations to determine methane concentrations using purge-and-trap analysis
Calibration parameters								Gas concentration and calibration						Sample parameters				Sample concentration
Standard Identification	Concentration (ppm)	Volume Injected (ml)	Volume Injected (L)	Temperature (oC)	T (K)	Atmospheric pressure (Atm)	Peak Area	R (l*Atm/mol/K)	mol gas	mol CH4	nmol CH4	slope	Intercept	In situ Density	Vol purged (ml)	Vol sampled (L)	Peak Area	CH4 (nmol)	CH4 (nM)	CH4 (nmol kg-1)
SCOR ARS416388	1.924	1	0.001	22	295.15	0.999	28.8	0.082057	4.12484e-05	7.93619e-11	0.0793619	374.477	-0.584615	23.73	74.7	0.0747	60.81	0.163948	2.19475	2.14387
SCOR ARS416388	1.924	2	0.002	22	295.15	0.999	59.3	0.082057	8.24968e-05	1.58724e-10	0.158724			23.73	76.69	0.07669	62.5	0.16846	2.19664	2.14572
SCOR ARS416388	1.924	5	0.005	22	295.15	0.999	147.9	0.082057	0.000206242	3.9681e-10	0.39681			23.73	74.72	0.07472	62.2	0.167659	2.24384	2.19182
Column A	Standard identification
Column B	Concentration of the standard in ppm
Column C	Volume of standard injected into the GC (ml)
Column D	Volume of standard injected into the GC (liter)
Column E	Laboratory temperature (oC)
Column F	Laboratory temperature (K)
Column G	Laboratory Atmospheric Pressure (Atm)
Column H	Peak area of standard
Column I	Ideal gas constant
Column J	Quantity of gas analyzed (moles)
Column K	Concentration of methane analyzed (moles)
Column L	Concentration of methane analyzed (nanomoles)
Column M	Calibration slope
Column N	Calibration intercept
Column O	Density of seawater sample
Column P	Volume of seawater sample analyzed (ml)
Column Q	Volume of seawater sample analyzed (liter)
Column R	Peak area of sample
Column S	Methane concentration (moles)
Column T	Methane concentration (nanomolar)
Column U	Methane concentration (nanomole/kg)
Parameters and calculations to determine nitrous oxide concentrations using purge-and-trap analysis
Calibration parameters								Gas concentration and calibration							Sample parameters				Sample concentration
Standard Identification	Concentration (ppm)	Volume Injected (ml)	Volume Injected (L)	Temperature (oC)	T (K)	Atmospheric pressure (Atm)	Peak Area	R (l*Atm/mol/K)	mol gas	mol N2O	nmol N2O	a	b	c	In situ Density	Vol purged (ml)	Vol sampled (L)	Peak Area	N2O (nmol)	N2O (nM)	N2O (nmol kg-1)
SCOR ARS416388	22.271	1	0.001	22	295.15	0.999	2695	0.082057	4.12484e-05	9.18643e-10	0.918643	-172.072	3001.78	49.1076	23.73	74.84	0.07484	8000	3.2567	43.5155	42.5069
SCOR ARS416388	22.271	2	0.002	22	295.15	0.999	4950	0.082057	8.24968e-05	1.83729e-09	1.83729				23.73	74.68	0.07468	8284.1	3.40989	45.66	44.6016
SCOR ARS416388	22.271	3	0.003	22	295.15	0.999	7026	0.082057	0.000123745	2.75593e-09	2.75593				23.73	74.56	0.07456	8130.3	3.32642	44.614	43.5798
SCOR WRS416388	0.3253	2	0.002	22	295.15	0.999	113	0.082057	8.24968e-05	2.68362e-11	0.0268362				23.73	74.7	0.0747	1575.1	0.524109	7.01618	6.85355
SCOR WRS416388	0.3253	5	0.005	22	295.15	0.999	255	0.082057	0.000206242	6.70905e-11	0.0670905				23.73	76.69	0.07669	1601.5	0.533471	6.9562	6.79496
Column A	Standard identification
Column B	Concentration of the standard in ppm
Column C	Volume of standard injected into the GC (ml)
Column D	Volume of standard injected into the GC (liter)
Column E	Laboratory temperature (oC)
Column F	Laboratory temperature (K)
Column G	Laboratory Atmospheric Pressure (Atm)
Column H	Peak area of standard
Column I	Ideal gas constant
Column J	Quantity of gas analyzed (moles)
Column K	Concentration of Nitrous oxide analyzed (moles)
Column L	Concentration of Nitrous oxide analyzed (nanomoles)
Column M	Calbration Quadratic fit a
Column N	Calbration Quadratic fit b
Column O	Calbration Quadratic fit c
Column P	Density of seawater sample
Column Q	Volume of seawater sample analyzed (ml)
Column R	Volume of seawater sample analyzed (liter)
Column S	Peak area of sample
Column T	Nitrous oxide concentration (moles)
Column U	Nitrous oxide concentration (nanomolar)
Column v	Nitrous oxide concentration (nanomole/kg)

## Sheet: Headspace
Calculations used to determine methane concentrations via headspace analysis
				Concentration (ppm)= intercept + area*slope														Methane solubility equation from Wiesenburg and Guinasso (1979) J. Chem. Eng. Data 24, 354-360.
Calibration parameters				Calibration		Sample Information				Sample analysis								Calculation input terms									Sample concentration
Standard Identification	Concentration (ppm)	Volume Injected (ml)	Peak Area	Slope	Intercept	Sample ID	In situ Temp	Salinity	In situ Density	Lab pressure (atm)	Equilibration temperature (ºC)	Total sample volume (mL)	Water phase volume (mL)	Headspace phase volume (mL)	Sample Peak Area	xCH4 headspace (ppb)	x0	A1	A2	A3	A4	B1	B2	B3	R (gas constant) L atm K-1 mol-1	Equilibrium solubility C* (nmol /L atm)	CH4 (nM)	CH4 (nmol kg-1)
N2	0	1	0	9.36192	0	25 m	23.6	34.97	1023.73	1	20.9	241.8	222.1	19.7	4.34	463.58	0	-415.281	596.81	379.26	-62.0757	-0.05916	0.032174	-0.0048198	0.0820575	1.19322e+06	2.24178	2.18982
STD1	3	1	28.324	9.36192	0	25 m	23.6	34.97	1023.73	1	20.9	238.7	219	19.7	4.45	475.33	0	-415.281	596.81	379.26	-62.0757	-0.05916	0.032174	-0.0048198	0.0820575	1.19322e+06	2.32311	2.26926
STD2	4.866	1	47.3633	9.36192	0	25 m	23.6	34.97	1023.73	1	20.9	243.1	223.4	19.7	4.26	455.035	0	-415.281	596.81	379.26	-62.0757	-0.05916	0.032174	-0.0048198	0.0820575	1.19322e+06	2.19081	2.14003
STD4_SCOR ARS426347	1.959	1	18.264	9.36192	0	25 m	23.6	34.97	1023.73	1	20.9	242.3	222.6	19.7	4.41	471.057	0	-415.281	596.81	379.26	-62.0757	-0.05916	0.032174	-0.0048198	0.0820575	1.19322e+06	2.27409	2.22137
STD5 SCOR WRS464537	4.827	1	47.1147	9.36192	0	25 m	23.6	34.97	1023.73	1	20.9	242.3	222.6	19.7	4.41	471.057	0	-415.281	596.81	379.26	-62.0757	-0.05916	0.032174	-0.0048198	0.0820575	1.19322e+06	2.27409	2.22137
Column A	Standard identification
Column B	Concentration of the standard in ppm
Column C	Volume of standard injected into the GC (ml)
Column D	Peak area of standard
Column E	Calibration slope
Column F	Calibration intercept
Column G	Sample identification code
Column H	In situ sample temperature (ºC)
Column I	In situ salinity
Column J	Density of seawater sample (kg m-3)
Column K	Laboratory Atmospheric Pressure (Atm)
Column L	Laboratory temperature during equilibration (ºC)
Column M	Volume of total seawater sample (ml)
Column N	Volume of seawater phase during equilibration (ml)
Column O	Volume of headspace phase during equilibration (ml)
Column P	Peak area of sample
Column Q	CH4 mixing ratio in headspace in equilibrium with water sample (ppb)
Column R	CH4 initial mixing ratio in the equilibrator gas (time=0) (ppb)
Column S to Y	Coefficients of CH4 equilibrium solubility equation from Wiesenburg and Guinasso (1979) J. Chem. Eng. Data 24, 354-360. Table 6. (nmol L-1 atm -1)
Column Z	Ideal gas constant (L atm K-1 mol-1)
Column AA	CH4 equilibrium solubility equation from Wiesenburg and Guinasso (1979) J. Chem. Eng. Data 24, 354-360. Equation 6. (nmol L-1 atm -1)
Column AB	Methane concentration (nanomolar)
Column AC	Methane concentration (nanomole/kg)
Calculations used to determine nitrous oxide concentrations via headspace analysis
				Concentration (ppm)= intercept + area*slope (steepwise lineal)														Nitrous oxide solubility equation from Weiss and Price (1980) Mar. Chem. 8, 347–359
Calibration parameters				Calibration		Sample Information				Sample analysis								Calculation input terms									Sample concentration
Standard Identification	Concentration (ppb)	Volume Injected (ml)	Peak Area	Slope	Intercept	Sample ID	In situ Temp	Salinity	In situ Density	Lab pressure (atm)	Equilibration temperature (ºC)	Total sample volume (mL)	Water phase volume (mL)	Headspace phase volume (mL)	Sample Peak Area	xN2O headspace (ppb)	x0	A1	A2	A3	A4	B1	B2	B3	R (gas constant) L atm K-1 mol-1	Equilibrium solubility F (mol /L atm)	N2O (nM)	N2O (nmol kg-1)
N2	0	2	0	17.5348	0	25 m	23.6	34.97	1023.73	1	20.9	241.8	222.1	19.7	4774	272.259	0	-165.881	222.874	92.0792	-1.48425	-0.056235	0.031619	-0.0048472	0.0820575	0.0226951	7.17066	7.00445
STD4_SCOR ARS426347	332.1	2	5823.3	14.1023	1139.91	25 m	23.6	34.97	1023.73	1	20.9	238.7	219	19.7	4771	272.088	0	-165.881	222.874	92.0792	-1.48425	-0.056235	0.031619	-0.0048472	0.0820575	0.0226951	7.18019	7.01375
STD1	1020	2	15524.3	12.1244	3157.44	25 m	23.6	34.97	1023.73	1	20.9	243.1	223.4	19.7	4767	271.86	0	-165.881	222.874	92.0792	-1.48425	-0.056235	0.031619	-0.0048472	0.0820575	0.0226951	7.15439	6.98855
STD2	3100	2	40743			25 m	23.6	34.97	1023.73	1	20.9	242.3	222.6	19.7	4767	271.86	0	-165.881	222.874	92.0792	-1.48425	-0.056235	0.031619	-0.0048472	0.0820575	0.0226951	7.15792	6.992
Column A	Standard identification
Column B	Concentration of the standard in ppm
Column C	Volume of standard injected into the GC (ml)
Column D	Peak area of standard
Column E	Calibration slope
Column F	Calibration intercept
Column G	Sample identification code
Column H	In situ sample temperature (ºC)
Column I	In situ salinity
Column J	Density of seawater sample (kg m-3)
Column K	Laboratory Atmospheric Pressure (Atm)
Column L	Laboratory temperature during equilibration (ºC)
Column M	Volume of total seawater sample (ml)
Column N	Volume of seawater phase during equilibration (ml)
Column O	Volume of headspace phase during equilibration (ml)
Column P	Peak area of sample
Column Q	N2O mixing ratio in headspace in equilibrium with water sample (ppb)
Column R	N2O initial mixing ratio in the equilibrator gas (time=0) (ppb)
Column S to Y	Coefficients of Nitrous oxide solubility equation from Weiss and Price (1980) Mar. Chem. 8, 347–359. Table 2 (mol L-1 atm -1)
Column Z	Ideal gas constant (L atm K-1 mol-1)
Column AA	Equilibrium solubility equation from Weiss and Price (1980) Mar. Chem. 8, 347–359. Equation 13 (mol L-1 atm -1)
Column AB	Nitrous oxide concentration (nanomolar)
Column AC	Nitrous oxide concentration (nanomole/kg)
